# Supplementary material for: Potential backfiring effects of Marine Protected Areas on kelp herbivory
Source: PubMed Central journal article supplement — Sci Rep. 2024 Dec 28;14:31217. doi: 10.1038/s41598-024-82557-7 (PMC11682423; doi:10.1038/s41598-024-82557-7), 2024-12-28
Supplement: 41598_2024_82557_MOESM1_ESM.pdf [file 41598_2024_82557_MOESM1_ESM.pdf]

## Potential backfiring effects of Marine Protected Areas on kelp herbivory

Reis B <sup>1,2,3</sup>, Arenas F <sup>1</sup>, Sánchez-Gallego Á <sup>3</sup>, Marques A F S <sup>3</sup>, Sousa-Pinto I <sup>1,2</sup>, Franco J N <sup>3</sup>

<sup>1</sup> CIIMAR/CIMAR-LA -Interdisciplinary Centre of Marine and Environmental Research, University of Porto, Avenida General Norton de Matos, S/N, 4450-208 Matosinhos, Portugal

<sup>2</sup> Faculty of Sciences, Department of Biology– University of Porto, Rua do Campo Alegre 1021 1055, 4169-007 Porto, Portugal

<sup>3</sup> MARE-Marine and Environmental Sciences Centre & ARNET—Aquatic Research Network Associated Laboratory - CETEMARES, Av. do Porto de Pesca 30, 2520-620 Peniche, Portugal

\* Corresponding author e-mail: rbiancareis@ciimar.up.pt

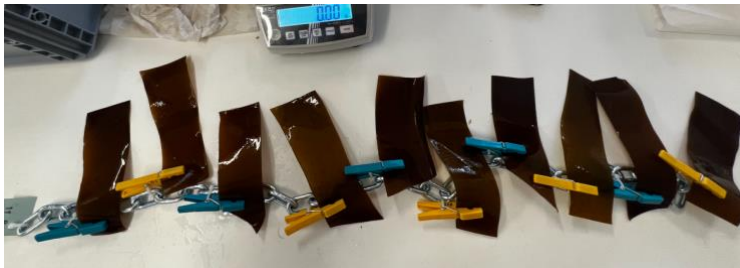

Supplementary Figure 1 - Stainless-steel chain with 10 pieces of different kelp attached with pegs (5 of *L. ochroleuca* and 5 of *S. polyschides*).

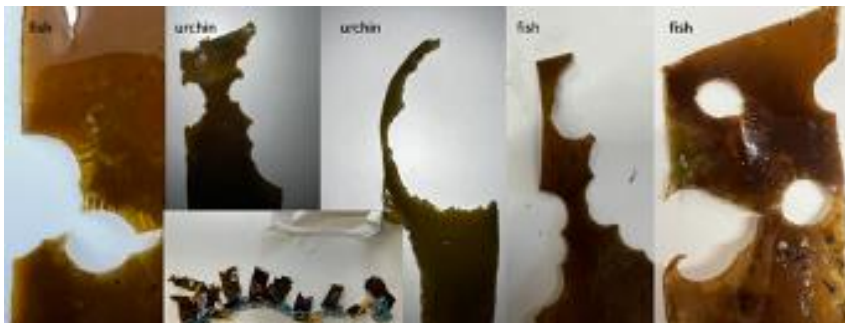

Supplementary Figure 2 - Bite marks in kelp pieces from *L. ochroleuca* and *S. polyschides*. A regular, round pattern characterises fish bitemarks, while urchin bitemarks are irregular.

Supplementary Table S1 - Results of Generalized linear mixed models (glmmTMB) for differences in herbivory occurrence and % of consumed biomass between sites, depths, kelp species and grazers.

| A. Herbivory– Occurrence (Fig.1 of the main document)                                                                                                                                                                                                                                                                                                                                                                                                                                                             | B. Herbivory - % of consumed biomass (Fig. 2, Fig.3, Fig.4 of the main document)                                                                                                            |       |               |   |      |        |   |             |       |        |   |            |      |         |   |              |                                                                                                                                                                                                                                                                                                                                                                                                                                                                                                                                                                                                                                                                                                                                                                                                                                                   |  |       |    |   |      |        |   |           |       |         |   |               |        |         |   |               |      |         |   |               |            |         |   |               |             |        |   |           |            |        |   |           |
|-------------------------------------------------------------------------------------------------------------------------------------------------------------------------------------------------------------------------------------------------------------------------------------------------------------------------------------------------------------------------------------------------------------------------------------------------------------------------------------------------------------------|---------------------------------------------------------------------------------------------------------------------------------------------------------------------------------------------|-------|---------------|---|------|--------|---|-------------|-------|--------|---|------------|------|---------|---|--------------|---------------------------------------------------------------------------------------------------------------------------------------------------------------------------------------------------------------------------------------------------------------------------------------------------------------------------------------------------------------------------------------------------------------------------------------------------------------------------------------------------------------------------------------------------------------------------------------------------------------------------------------------------------------------------------------------------------------------------------------------------------------------------------------------------------------------------------------------------|--|-------|----|---|------|--------|---|-----------|-------|---------|---|---------------|--------|---------|---|---------------|------|---------|---|---------------|------------|---------|---|---------------|-------------|--------|---|-----------|------------|--------|---|-----------|
| Best suited model:<br>Null Herbivory ~ Site + Depth + Kelp + (1   Site/Reef) + (1   Season),<br>family = binomial<br>link = "logit"                                                                                                                                                                                                                                                                                                                                                                               | Best suited model:<br>% of consumed biomass ~ Site + Depth + Grazer + Kelp +<br>Site:Depth + Grazer:Kelp + Depth:Kelp + (1   Site/Reef) + (1  <br>Season)<br>family = Gamma<br>link = "log" |       |               |   |      |        |   |             |       |        |   |            |      |         |   |              |                                                                                                                                                                                                                                                                                                                                                                                                                                                                                                                                                                                                                                                                                                                                                                                                                                                   |  |       |    |   |      |        |   |           |       |         |   |               |        |         |   |               |      |         |   |               |            |         |   |               |             |        |   |           |            |        |   |           |
| Analysis of Deviance Table (Type II Wald chisquare tests) <table border="1" data-bbox="114 730 1099 869"> <thead> <tr> <th></th> <th>Chisq</th> <th>Df</th> <th>P</th> </tr> </thead> <tbody> <tr> <td>Site</td> <td>7.5543</td> <td>1</td> <td>0.005987 **</td> </tr> <tr> <td>Depth</td> <td>5.8969</td> <td>1</td> <td>0.015168 *</td> </tr> <tr> <td>Kelp</td> <td>42.5301</td> <td>1</td> <td>6.96e-11 ***</td> </tr> </tbody> </table> ---<br>Signif. codes: 0 '***' 0.001 '**' 0.01 '*' 0.05 '.' 0.1 ' ' 1 |                                                                                                                                                                                             | Chisq | Df            | P | Site | 7.5543 | 1 | 0.005987 ** | Depth | 5.8969 | 1 | 0.015168 * | Kelp | 42.5301 | 1 | 6.96e-11 *** | Analysis of Deviance Table (Type II Wald chisquare tests) <table border="1" data-bbox="1099 730 2009 1013"> <thead> <tr> <th></th> <th>Chisq</th> <th>Df</th> <th>P</th> </tr> </thead> <tbody> <tr> <td>Site</td> <td>4.1212</td> <td>1</td> <td>0.04235 *</td> </tr> <tr> <td>Depth</td> <td>61.9081</td> <td>1</td> <td>3.599e-15 ***</td> </tr> <tr> <td>Grazer</td> <td>30.0765</td> <td>1</td> <td>4.153e-08 ***</td> </tr> <tr> <td>Kelp</td> <td>27.2369</td> <td>1</td> <td>1.800e-07 ***</td> </tr> <tr> <td>Site:Depth</td> <td>31.9984</td> <td>1</td> <td>1.543e-08 ***</td> </tr> <tr> <td>Grazer:Kelp</td> <td>5.1063</td> <td>1</td> <td>0.02384 *</td> </tr> <tr> <td>Depth:Kelp</td> <td>3.3307</td> <td>1</td> <td>0.06800 .</td> </tr> </tbody> </table> ---<br>Signif. codes: 0 '***' 0.001 '**' 0.01 '*' 0.05 '.' 0.1 ' ' 1 |  | Chisq | Df | P | Site | 4.1212 | 1 | 0.04235 * | Depth | 61.9081 | 1 | 3.599e-15 *** | Grazer | 30.0765 | 1 | 4.153e-08 *** | Kelp | 27.2369 | 1 | 1.800e-07 *** | Site:Depth | 31.9984 | 1 | 1.543e-08 *** | Grazer:Kelp | 5.1063 | 1 | 0.02384 * | Depth:Kelp | 3.3307 | 1 | 0.06800 . |
|                                                                                                                                                                                                                                                                                                                                                                                                                                                                                                                   | Chisq                                                                                                                                                                                       | Df    | P             |   |      |        |   |             |       |        |   |            |      |         |   |              |                                                                                                                                                                                                                                                                                                                                                                                                                                                                                                                                                                                                                                                                                                                                                                                                                                                   |  |       |    |   |      |        |   |           |       |         |   |               |        |         |   |               |      |         |   |               |            |         |   |               |             |        |   |           |            |        |   |           |
| Site                                                                                                                                                                                                                                                                                                                                                                                                                                                                                                              | 7.5543                                                                                                                                                                                      | 1     | 0.005987 **   |   |      |        |   |             |       |        |   |            |      |         |   |              |                                                                                                                                                                                                                                                                                                                                                                                                                                                                                                                                                                                                                                                                                                                                                                                                                                                   |  |       |    |   |      |        |   |           |       |         |   |               |        |         |   |               |      |         |   |               |            |         |   |               |             |        |   |           |            |        |   |           |
| Depth                                                                                                                                                                                                                                                                                                                                                                                                                                                                                                             | 5.8969                                                                                                                                                                                      | 1     | 0.015168 *    |   |      |        |   |             |       |        |   |            |      |         |   |              |                                                                                                                                                                                                                                                                                                                                                                                                                                                                                                                                                                                                                                                                                                                                                                                                                                                   |  |       |    |   |      |        |   |           |       |         |   |               |        |         |   |               |      |         |   |               |            |         |   |               |             |        |   |           |            |        |   |           |
| Kelp                                                                                                                                                                                                                                                                                                                                                                                                                                                                                                              | 42.5301                                                                                                                                                                                     | 1     | 6.96e-11 ***  |   |      |        |   |             |       |        |   |            |      |         |   |              |                                                                                                                                                                                                                                                                                                                                                                                                                                                                                                                                                                                                                                                                                                                                                                                                                                                   |  |       |    |   |      |        |   |           |       |         |   |               |        |         |   |               |      |         |   |               |            |         |   |               |             |        |   |           |            |        |   |           |
|                                                                                                                                                                                                                                                                                                                                                                                                                                                                                                                   | Chisq                                                                                                                                                                                       | Df    | P             |   |      |        |   |             |       |        |   |            |      |         |   |              |                                                                                                                                                                                                                                                                                                                                                                                                                                                                                                                                                                                                                                                                                                                                                                                                                                                   |  |       |    |   |      |        |   |           |       |         |   |               |        |         |   |               |      |         |   |               |            |         |   |               |             |        |   |           |            |        |   |           |
| Site                                                                                                                                                                                                                                                                                                                                                                                                                                                                                                              | 4.1212                                                                                                                                                                                      | 1     | 0.04235 *     |   |      |        |   |             |       |        |   |            |      |         |   |              |                                                                                                                                                                                                                                                                                                                                                                                                                                                                                                                                                                                                                                                                                                                                                                                                                                                   |  |       |    |   |      |        |   |           |       |         |   |               |        |         |   |               |      |         |   |               |            |         |   |               |             |        |   |           |            |        |   |           |
| Depth                                                                                                                                                                                                                                                                                                                                                                                                                                                                                                             | 61.9081                                                                                                                                                                                     | 1     | 3.599e-15 *** |   |      |        |   |             |       |        |   |            |      |         |   |              |                                                                                                                                                                                                                                                                                                                                                                                                                                                                                                                                                                                                                                                                                                                                                                                                                                                   |  |       |    |   |      |        |   |           |       |         |   |               |        |         |   |               |      |         |   |               |            |         |   |               |             |        |   |           |            |        |   |           |
| Grazer                                                                                                                                                                                                                                                                                                                                                                                                                                                                                                            | 30.0765                                                                                                                                                                                     | 1     | 4.153e-08 *** |   |      |        |   |             |       |        |   |            |      |         |   |              |                                                                                                                                                                                                                                                                                                                                                                                                                                                                                                                                                                                                                                                                                                                                                                                                                                                   |  |       |    |   |      |        |   |           |       |         |   |               |        |         |   |               |      |         |   |               |            |         |   |               |             |        |   |           |            |        |   |           |
| Kelp                                                                                                                                                                                                                                                                                                                                                                                                                                                                                                              | 27.2369                                                                                                                                                                                     | 1     | 1.800e-07 *** |   |      |        |   |             |       |        |   |            |      |         |   |              |                                                                                                                                                                                                                                                                                                                                                                                                                                                                                                                                                                                                                                                                                                                                                                                                                                                   |  |       |    |   |      |        |   |           |       |         |   |               |        |         |   |               |      |         |   |               |            |         |   |               |             |        |   |           |            |        |   |           |
| Site:Depth                                                                                                                                                                                                                                                                                                                                                                                                                                                                                                        | 31.9984                                                                                                                                                                                     | 1     | 1.543e-08 *** |   |      |        |   |             |       |        |   |            |      |         |   |              |                                                                                                                                                                                                                                                                                                                                                                                                                                                                                                                                                                                                                                                                                                                                                                                                                                                   |  |       |    |   |      |        |   |           |       |         |   |               |        |         |   |               |      |         |   |               |            |         |   |               |             |        |   |           |            |        |   |           |
| Grazer:Kelp                                                                                                                                                                                                                                                                                                                                                                                                                                                                                                       | 5.1063                                                                                                                                                                                      | 1     | 0.02384 *     |   |      |        |   |             |       |        |   |            |      |         |   |              |                                                                                                                                                                                                                                                                                                                                                                                                                                                                                                                                                                                                                                                                                                                                                                                                                                                   |  |       |    |   |      |        |   |           |       |         |   |               |        |         |   |               |      |         |   |               |            |         |   |               |             |        |   |           |            |        |   |           |
| Depth:Kelp                                                                                                                                                                                                                                                                                                                                                                                                                                                                                                        | 3.3307                                                                                                                                                                                      | 1     | 0.06800 .     |   |      |        |   |             |       |        |   |            |      |         |   |              |                                                                                                                                                                                                                                                                                                                                                                                                                                                                                                                                                                                                                                                                                                                                                                                                                                                   |  |       |    |   |      |        |   |           |       |         |   |               |        |         |   |               |      |         |   |               |            |         |   |               |             |        |   |           |            |        |   |           |

Supplementary Table S2 - Results of Generalized linear mixed models (glmmTMB) for differences in grazer bitemarks frequency between sites, depths, kelp species and grazer.

| <b>Herbivory – Grazer frequency (Fig.5 of the main document)</b> |         |    |               |
|------------------------------------------------------------------|---------|----|---------------|
| Best suited model: Grazer frequency ~ Site + Depth + Kelp        |         |    |               |
| family = negative binomial                                       |         |    |               |
| link= "log"                                                      |         |    |               |
| Analysis of Deviance Table (Type II Wald chisquare tests)        |         |    |               |
|                                                                  | Chisq   | Df | P             |
| Site                                                             | 19.2873 | 1  | 1.125e-05 *** |
| Depth                                                            | 0.8352  | 1  | 0.3608        |
| Kelp                                                             | 0.2468  | 1  | 0.6193        |
| ---                                                              |         |    |               |
| Signif. codes: 0 '***' 0.001 '**' 0.01 '*' 0.05 '.' 0.1 ' ' 1    |         |    |               |

Supplementary Table S3. Results of Generalized linear mixed models (glmmTMB) for differences in fish and urchin abundance between sites and depths captures in Underwater Visual Census (UVC) and Diver Operated Videos (DOV).

| <b>UVC – Herbivorous Fish (Fig.6 a. and b. of the main document)</b>                                                                                                                                                                                                                                                                         | <b>UVC – Urchins (Fig.6 c. of the main document)</b>                                    |       |               |   |      |        |   |               |       |       |   |           |                                                                                                                                                                                                                                                                                                                                                                                                                            |  |       |    |   |      |        |   |               |       |       |   |        |            |        |   |               |
|----------------------------------------------------------------------------------------------------------------------------------------------------------------------------------------------------------------------------------------------------------------------------------------------------------------------------------------------|-----------------------------------------------------------------------------------------|-------|---------------|---|------|--------|---|---------------|-------|-------|---|-----------|----------------------------------------------------------------------------------------------------------------------------------------------------------------------------------------------------------------------------------------------------------------------------------------------------------------------------------------------------------------------------------------------------------------------------|--|-------|----|---|------|--------|---|---------------|-------|-------|---|--------|------------|--------|---|---------------|
| Best suited model: UVC_fish ~ Site + Depth<br>Family= negative binomial<br>Link= "log"                                                                                                                                                                                                                                                       | Best suited model: UVC_urchin ~ Site * Depth<br>Family=negative binomial<br>Link= "log" |       |               |   |      |        |   |               |       |       |   |           |                                                                                                                                                                                                                                                                                                                                                                                                                            |  |       |    |   |      |        |   |               |       |       |   |        |            |        |   |               |
| Analysis of Deviance Table (Type II tests)                                                                                                                                                                                                                                                                                                   | Analysis of Deviance Table (Type II tests)                                              |       |               |   |      |        |   |               |       |       |   |           |                                                                                                                                                                                                                                                                                                                                                                                                                            |  |       |    |   |      |        |   |               |       |       |   |        |            |        |   |               |
| <table> <thead> <tr> <th></th> <th>Chisq</th> <th>Df</th> <th>P</th> </tr> </thead> <tbody> <tr> <td>Site</td> <td>38.879</td> <td>1</td> <td>4.509e-10 ***</td> </tr> <tr> <td>Depth</td> <td>4.181</td> <td>1</td> <td>0.04087 *</td> </tr> </tbody> </table> <p>---<br/>Signif. codes: 0 '***' 0.001 '**' 0.01 '*' 0.05 '.' 0.1 ' ' 1</p> |                                                                                         | Chisq | Df            | P | Site | 38.879 | 1 | 4.509e-10 *** | Depth | 4.181 | 1 | 0.04087 * | <table> <thead> <tr> <th></th> <th>Chisq</th> <th>Df</th> <th>P</th> </tr> </thead> <tbody> <tr> <td>Site</td> <td>23.128</td> <td>1</td> <td>1.516e-06 ***</td> </tr> <tr> <td>Depth</td> <td>0.128</td> <td>1</td> <td>0.7204</td> </tr> <tr> <td>Site:Depth</td> <td>42.341</td> <td>1</td> <td>7.668e-11 ***</td> </tr> </tbody> </table> <p>---<br/>Signif. codes: 0 '***' 0.001 '**' 0.01 '*' 0.05 '.' 0.1 ' ' 1</p> |  | Chisq | Df | P | Site | 23.128 | 1 | 1.516e-06 *** | Depth | 0.128 | 1 | 0.7204 | Site:Depth | 42.341 | 1 | 7.668e-11 *** |
|                                                                                                                                                                                                                                                                                                                                              | Chisq                                                                                   | Df    | P             |   |      |        |   |               |       |       |   |           |                                                                                                                                                                                                                                                                                                                                                                                                                            |  |       |    |   |      |        |   |               |       |       |   |        |            |        |   |               |
| Site                                                                                                                                                                                                                                                                                                                                         | 38.879                                                                                  | 1     | 4.509e-10 *** |   |      |        |   |               |       |       |   |           |                                                                                                                                                                                                                                                                                                                                                                                                                            |  |       |    |   |      |        |   |               |       |       |   |        |            |        |   |               |
| Depth                                                                                                                                                                                                                                                                                                                                        | 4.181                                                                                   | 1     | 0.04087 *     |   |      |        |   |               |       |       |   |           |                                                                                                                                                                                                                                                                                                                                                                                                                            |  |       |    |   |      |        |   |               |       |       |   |        |            |        |   |               |
|                                                                                                                                                                                                                                                                                                                                              | Chisq                                                                                   | Df    | P             |   |      |        |   |               |       |       |   |           |                                                                                                                                                                                                                                                                                                                                                                                                                            |  |       |    |   |      |        |   |               |       |       |   |        |            |        |   |               |
| Site                                                                                                                                                                                                                                                                                                                                         | 23.128                                                                                  | 1     | 1.516e-06 *** |   |      |        |   |               |       |       |   |           |                                                                                                                                                                                                                                                                                                                                                                                                                            |  |       |    |   |      |        |   |               |       |       |   |        |            |        |   |               |
| Depth                                                                                                                                                                                                                                                                                                                                        | 0.128                                                                                   | 1     | 0.7204        |   |      |        |   |               |       |       |   |           |                                                                                                                                                                                                                                                                                                                                                                                                                            |  |       |    |   |      |        |   |               |       |       |   |        |            |        |   |               |
| Site:Depth                                                                                                                                                                                                                                                                                                                                   | 42.341                                                                                  | 1     | 7.668e-11 *** |   |      |        |   |               |       |       |   |           |                                                                                                                                                                                                                                                                                                                                                                                                                            |  |       |    |   |      |        |   |               |       |       |   |        |            |        |   |               |
| <b>DOV– Herbivorous Fish (Fig.6 d. of the main document)</b>                                                                                                                                                                                                                                                                                 |                                                                                         |       |               |   |      |        |   |               |       |       |   |           |                                                                                                                                                                                                                                                                                                                                                                                                                            |  |       |    |   |      |        |   |               |       |       |   |        |            |        |   |               |
| Best suited model : DOV_fish ~ Site<br>Family= negative binomial<br>Link= "log"                                                                                                                                                                                                                                                              |                                                                                         |       |               |   |      |        |   |               |       |       |   |           |                                                                                                                                                                                                                                                                                                                                                                                                                            |  |       |    |   |      |        |   |               |       |       |   |        |            |        |   |               |
| Analysis of Deviance Table (Type II tests)                                                                                                                                                                                                                                                                                                   |                                                                                         |       |               |   |      |        |   |               |       |       |   |           |                                                                                                                                                                                                                                                                                                                                                                                                                            |  |       |    |   |      |        |   |               |       |       |   |        |            |        |   |               |
| <table> <thead> <tr> <th></th> <th>Chisq</th> <th>Df</th> <th>P</th> </tr> </thead> <tbody> <tr> <td>Site</td> <td>86.085</td> <td>1</td> <td>&lt; 2.2e-16 ***</td> </tr> </tbody> </table> <p>---<br/>Signif. codes: 0 '***' 0.001 '**' 0.01 '*' 0.05 '.' 0.1 ' ' 1</p>                                                                     |                                                                                         | Chisq | Df            | P | Site | 86.085 | 1 | < 2.2e-16 *** |       |       |   |           |                                                                                                                                                                                                                                                                                                                                                                                                                            |  |       |    |   |      |        |   |               |       |       |   |        |            |        |   |               |
|                                                                                                                                                                                                                                                                                                                                              | Chisq                                                                                   | Df    | P             |   |      |        |   |               |       |       |   |           |                                                                                                                                                                                                                                                                                                                                                                                                                            |  |       |    |   |      |        |   |               |       |       |   |        |            |        |   |               |
| Site                                                                                                                                                                                                                                                                                                                                         | 86.085                                                                                  | 1     | < 2.2e-16 *** |   |      |        |   |               |       |       |   |           |                                                                                                                                                                                                                                                                                                                                                                                                                            |  |       |    |   |      |        |   |               |       |       |   |        |            |        |   |               |

Supplementary Table S4- Sum (s) and Abundance (MaxN) of herbivorous fish species and urchins obtained in the Underwater Visual Census (UVC) in Summer and Autumn, in both Sites and both Depths

| Site           | Depth   | Summer     |               |              |                 | Autumn     |               |              |                 |
|----------------|---------|------------|---------------|--------------|-----------------|------------|---------------|--------------|-----------------|
|                |         | UVC_fish_S | UVC_fish_MaxN | UVC_urchin_S | UVC_urchin_MaxN | UVC_fish_S | UVC_fish_MaxN | UVC_urchin_S | UVC_urchin_MaxN |
| <b>PEN</b>     | Deep    | 169        | 41            | 157          | 50              | 40         | 8             | 1            | 1               |
| <b>PEN</b>     | Shallow | 88         | 20            | 423          | 70              | 54         | 11            | 461          | 97              |
| <b>MPA-BER</b> | Deep    | 306        | 77            | 15           | 6               | 474        | 123           | 96           | 14              |
| <b>MPA-BER</b> | Shallow | 237        | 28            | 2            | 1               | 266        | 74            | 2            | 1               |

Supplementary Table S5 - Sum (s) and Abundance (MaxN) of herbivorous fish species obtained in the Diver Operated Videos (DOV) in both Sites and both Depths

| Site           | Depth   | DOV_fish_MaxN | DOV_fish_s |
|----------------|---------|---------------|------------|
| <b>PEN</b>     | Deep    | 3             | 22         |
| <b>PEN</b>     | Shallow | 5             | 18         |
| <b>MPA-BER</b> | Deep    | 50            | 133        |
| <b>MPA-BER</b> | Shallow | 30            | 142        |
